# Supplementary material for: Resting-State Electroencephalography and P300 Evidence: Age-Related Vestibular Loss as a Risk Factor Contributes to Cognitive Decline
Source: PubMed Central journal article supplement — J Alzheimers Dis. 2022 Apr 5;86(3):1107–21. doi: 10.3233/JAD-215467 (PMC9108596; doi:10.3233/jad-215467), 2022-04-05
Supplement: jad-86-jad215467-s001.pdf [file jad-86-jad215467-s001.pdf]

# Supplementary Material

## Resting-State Electroencephalography and P300 Evidence: Age-Related Vestibular Loss as a Risk Factor Contributes to Cognitive Decline

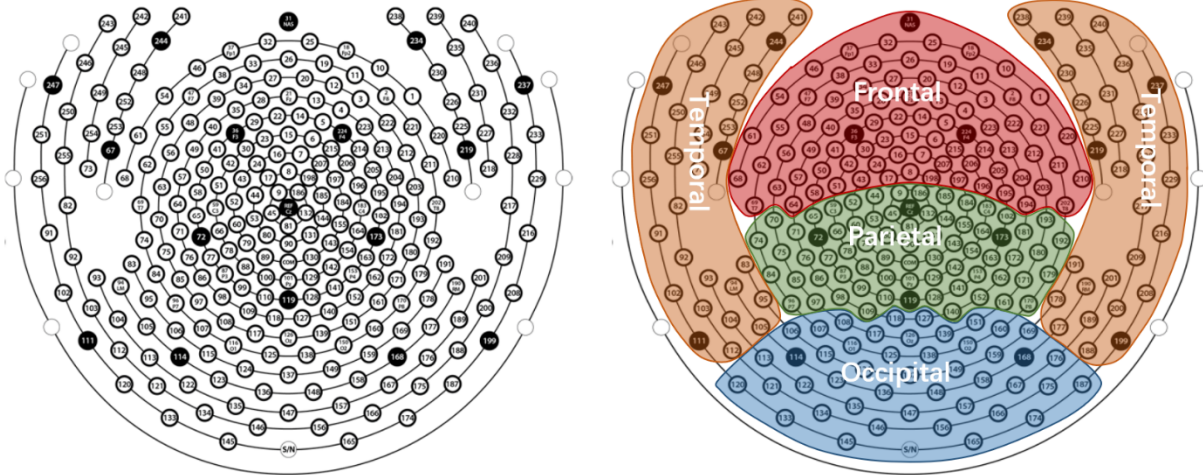

**Supplementary Figure 1.** Channel selection from the high density (256 electrodes) EEG. Left: Channel selection is shown for analyzing across the whole scalp. Right: Channel selection is shown for analyzing restricted to a certain lobe.
